# Supplementary material for: Carbazole fluorophore with an imidazole/thiazole unit: contrasting stimuli-induced fluorescence switching, water-sensing and deep-blue emission
Source: Royal Society of Chemistry journal article supplement (doi:10.1039/d3ra01897k), 2023-01-01
Supplement: d3ra01897k1.pdf [file d3ra01897k1.pdf]

### Electronic Supplementary Information (ESI)

#### Carbazole fluorophore with imidazole/thiazole unit: Contrasting stimuli-induced fluorescence switching, water sensing and deep blue emission

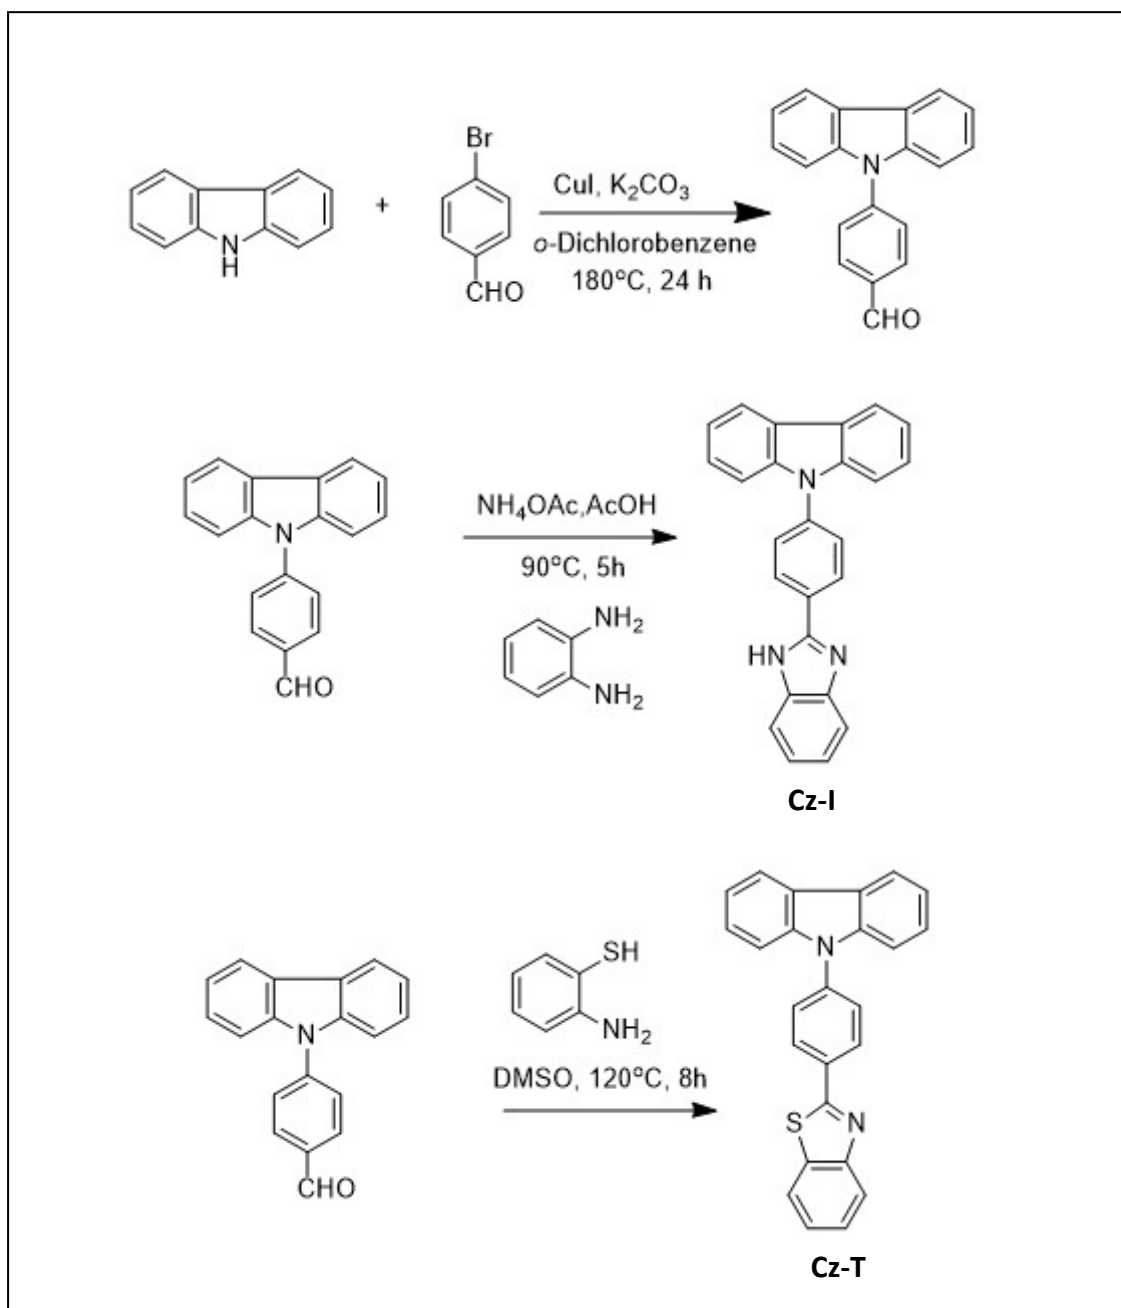

Scheme S1. Synthesis of Cz-I and Cz-T.

CA-NH-1H

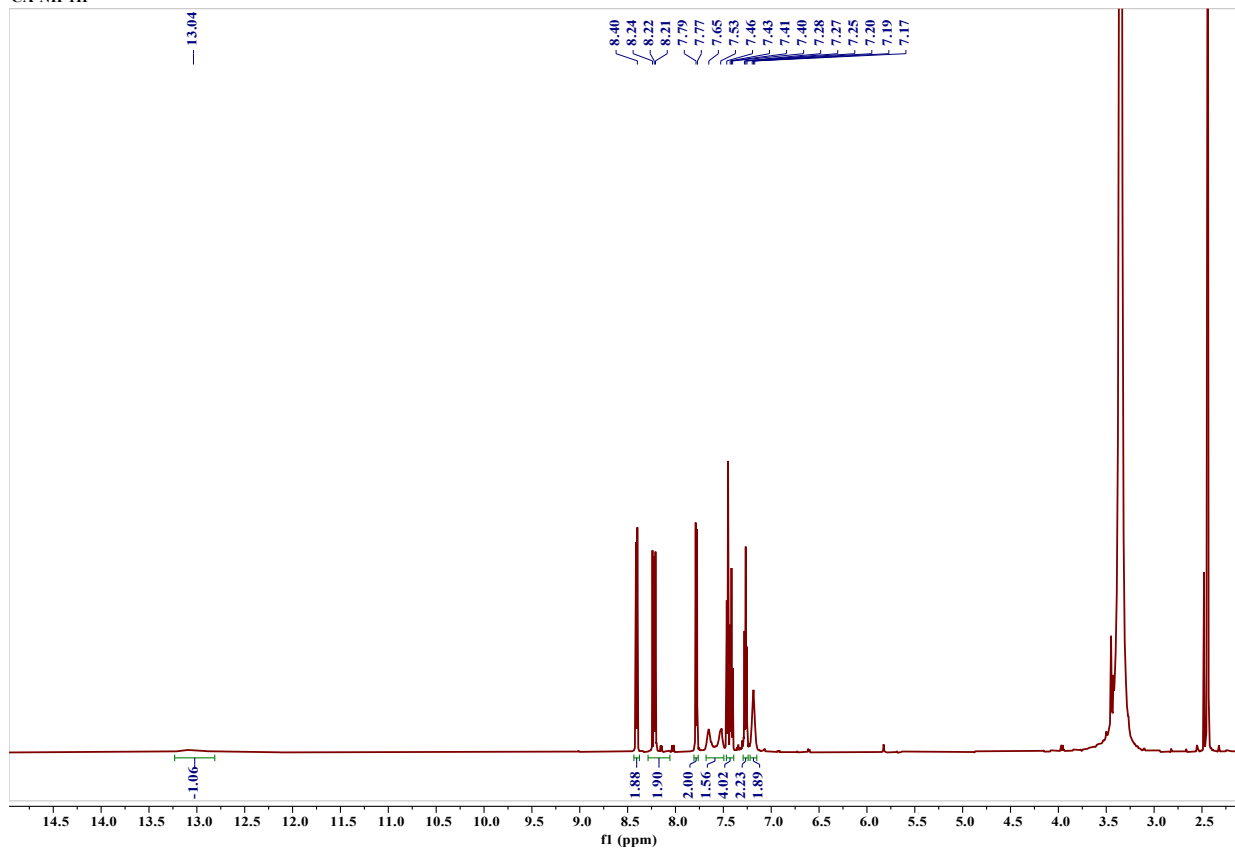

CA-NH 13C

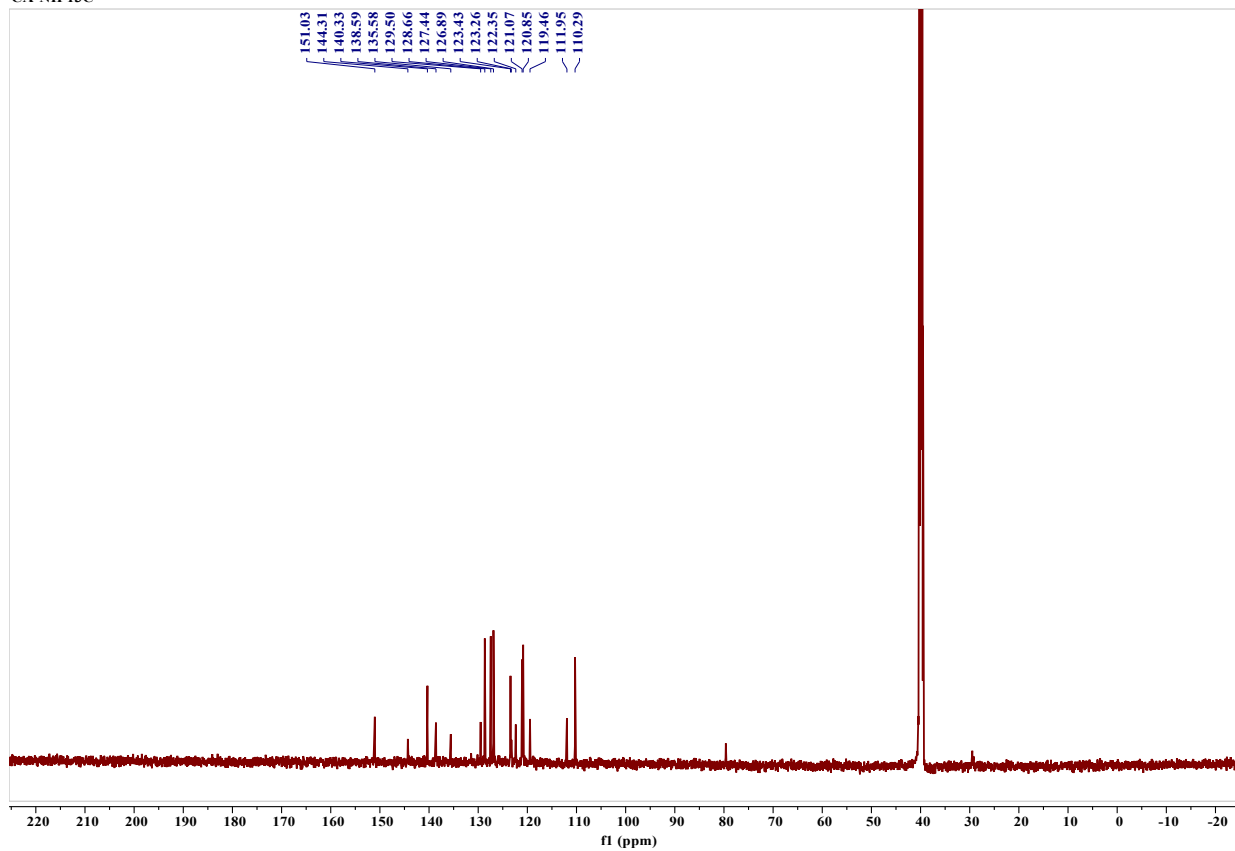

<sup>1</sup>H & <sup>13</sup>C NMR of Cz-I.

CA-SH 1H

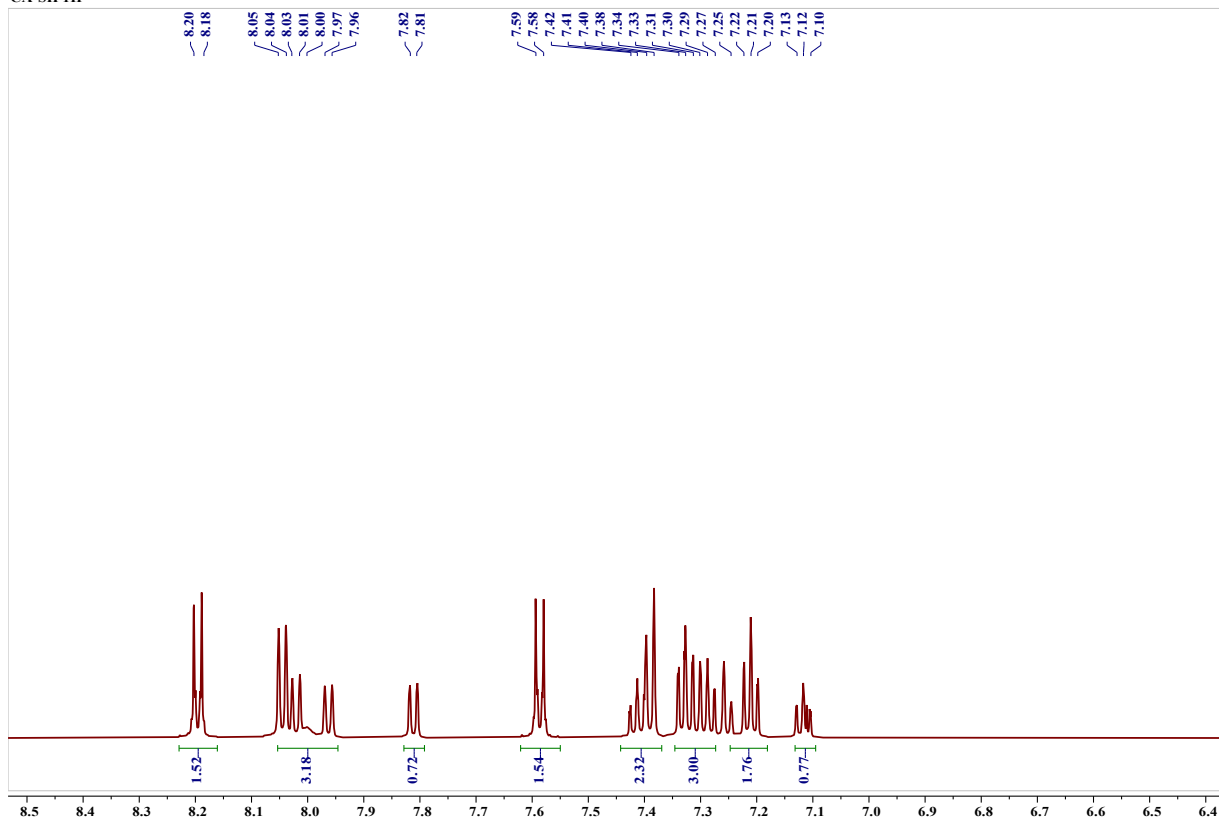

CA-SH 13C

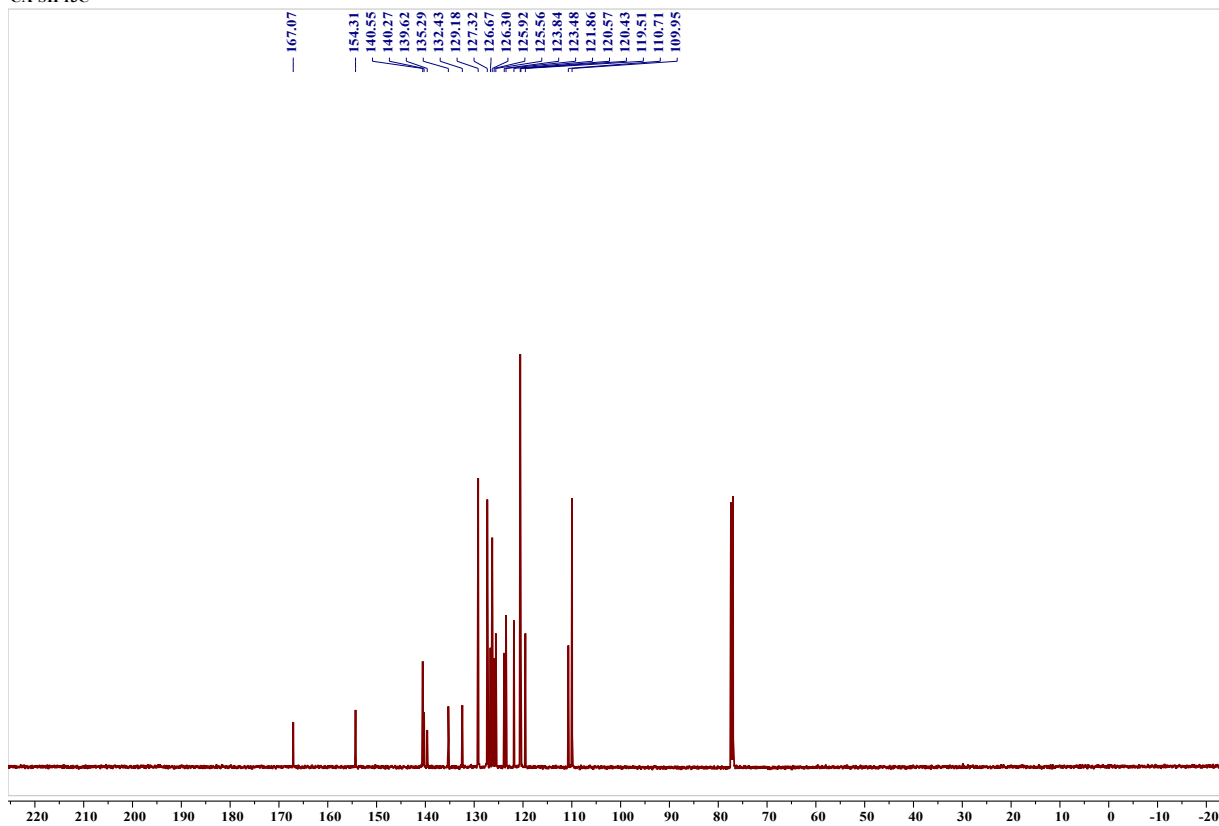

$^1\text{H}$  &  $^{13}\text{C}$  NMR of Cz-T.

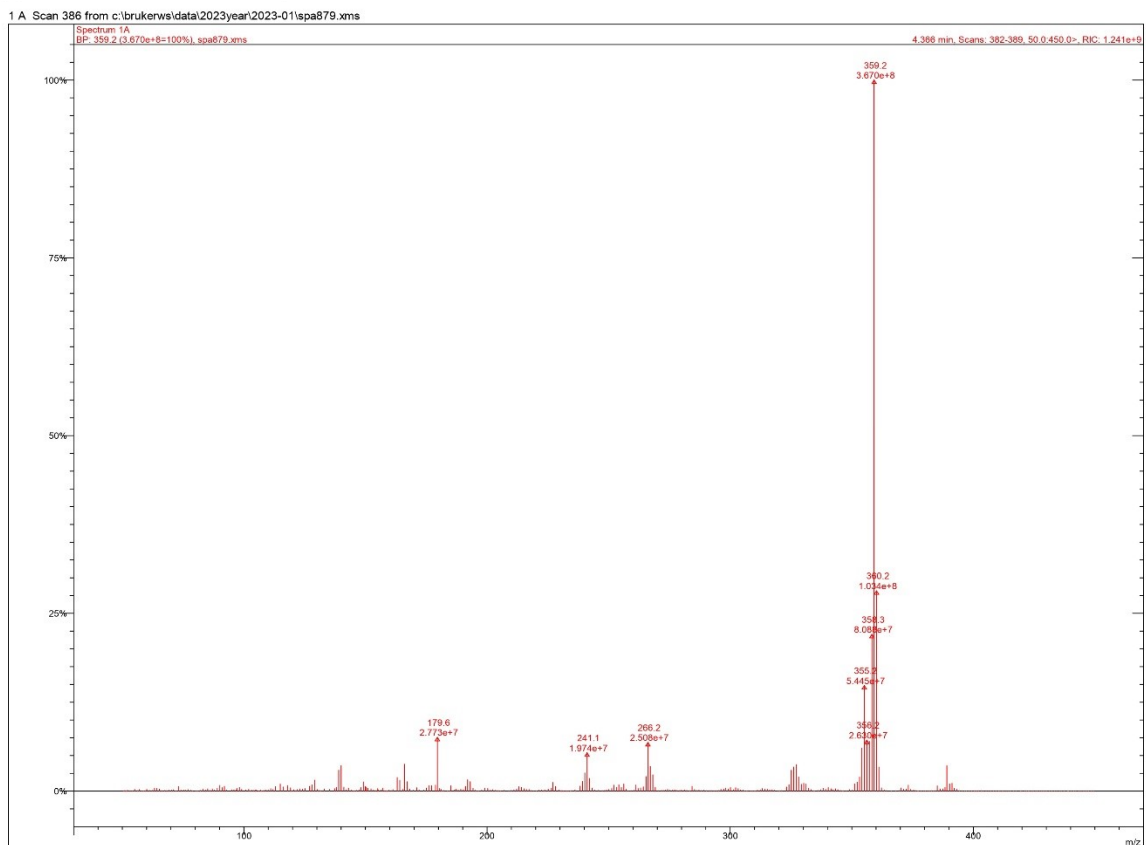

Mass spectrum of **Cz-I** m/z calculated  $C_{25}H_{17}N_3$  (M + H): 359.14, found: 359.2.

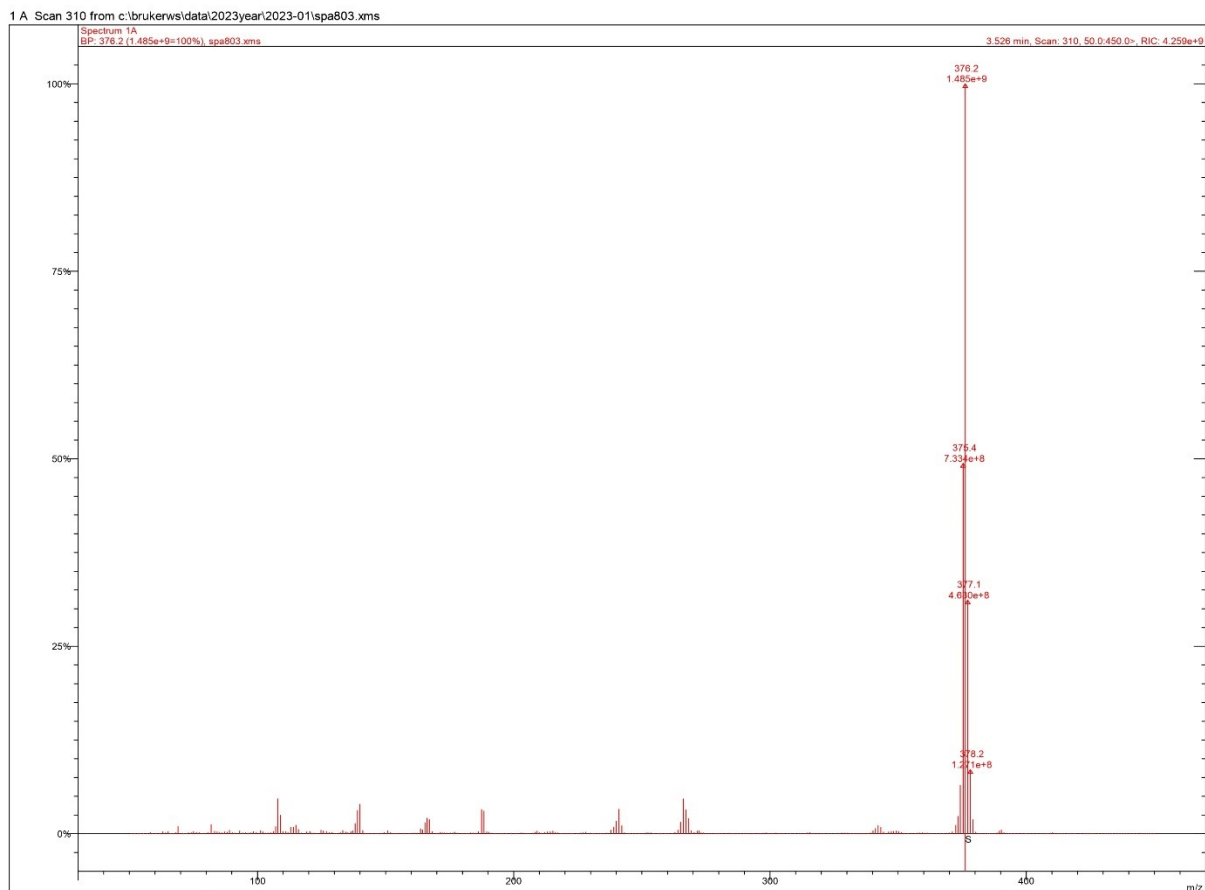

Mass spectrum of **Cz-T** m/z calculated  $C_{25}H_{17}N_2S$  (M + H): 376.14, found: 376.2.

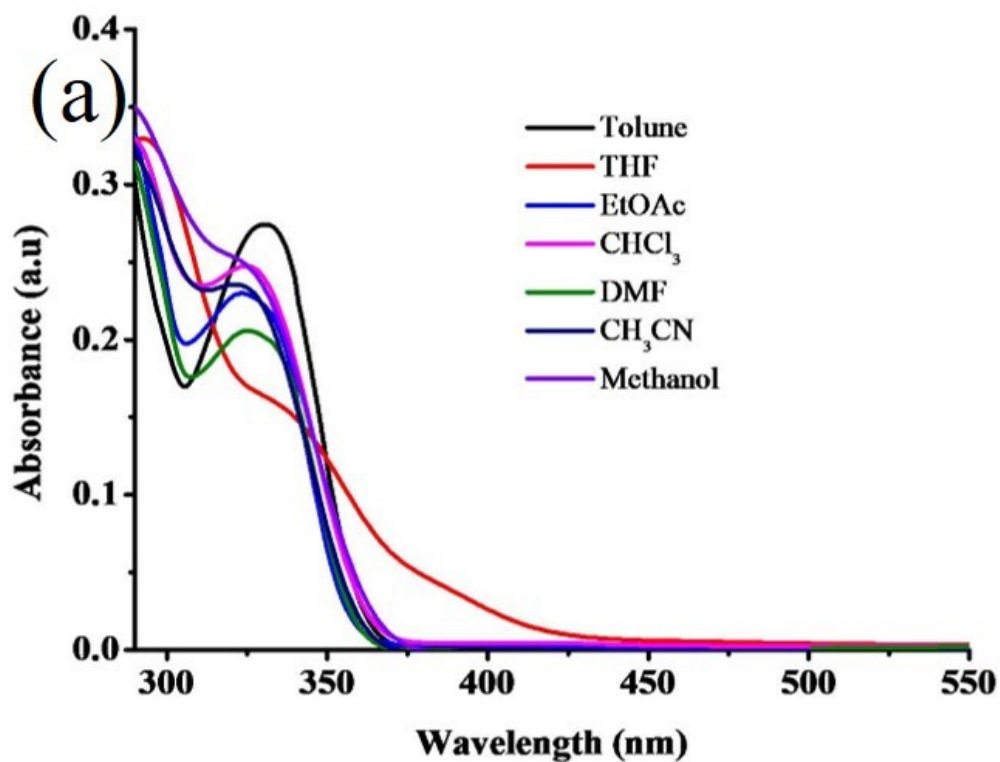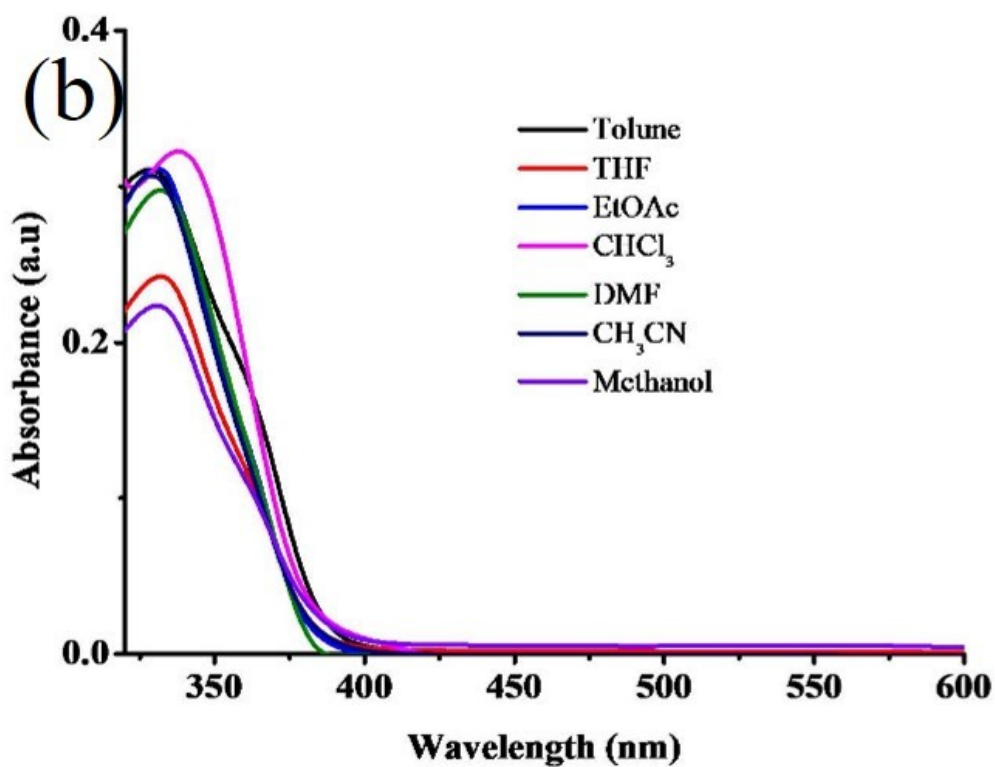

Figure S1. Absorption spectra of (a) Cz-I and (b) Cz-T.

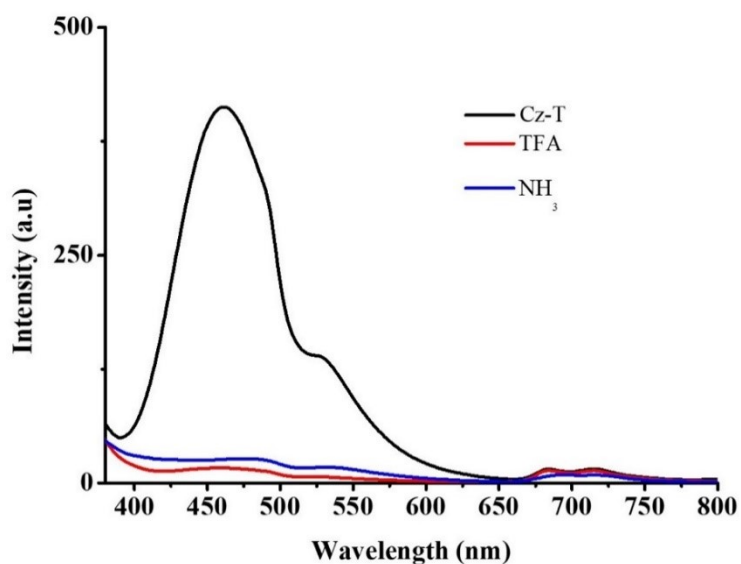

Figure S2. Halochromic fluorescence response of **Cz-T** by adding TFA/ $\text{NH}_3$  in  $\text{CH}_3\text{CN}$ .

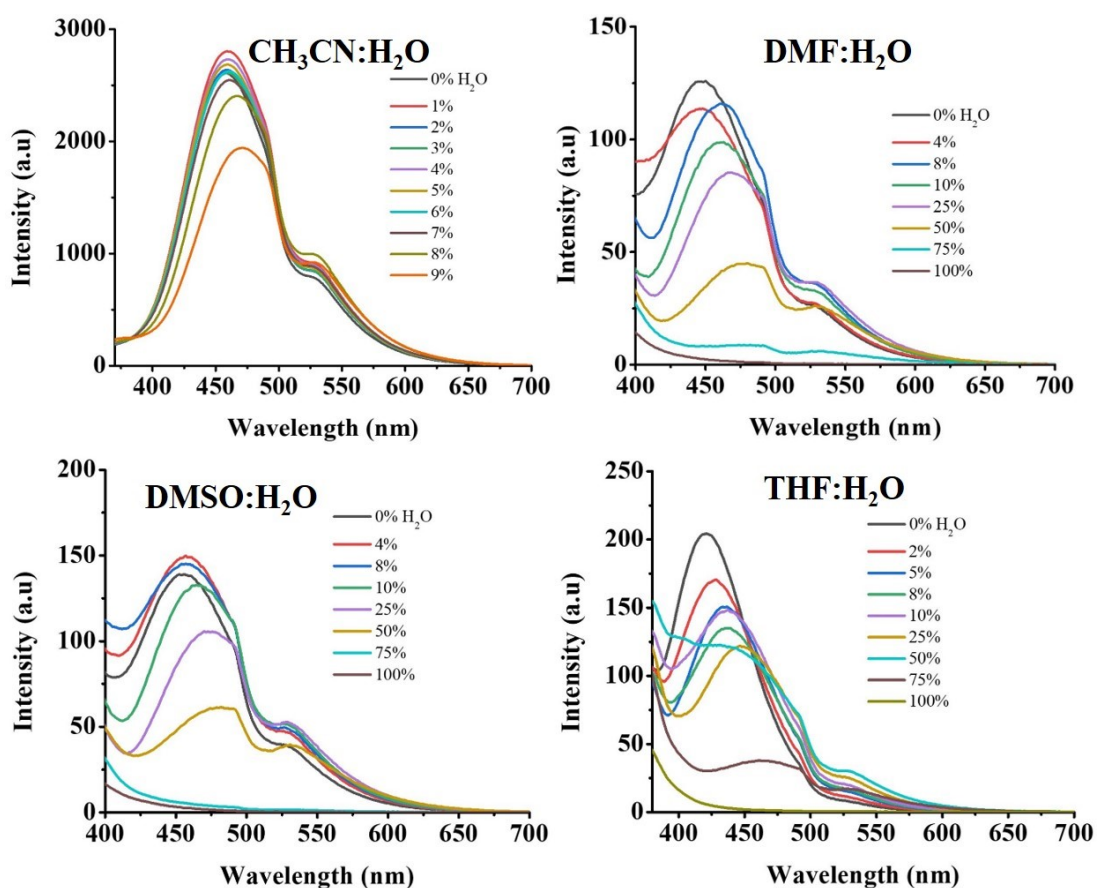

Figure S3. The change of **Cz-T** fluorescence response in  $\text{CH}_3\text{CN}$ , DMF, DMSO and THF with increasing water percentage.

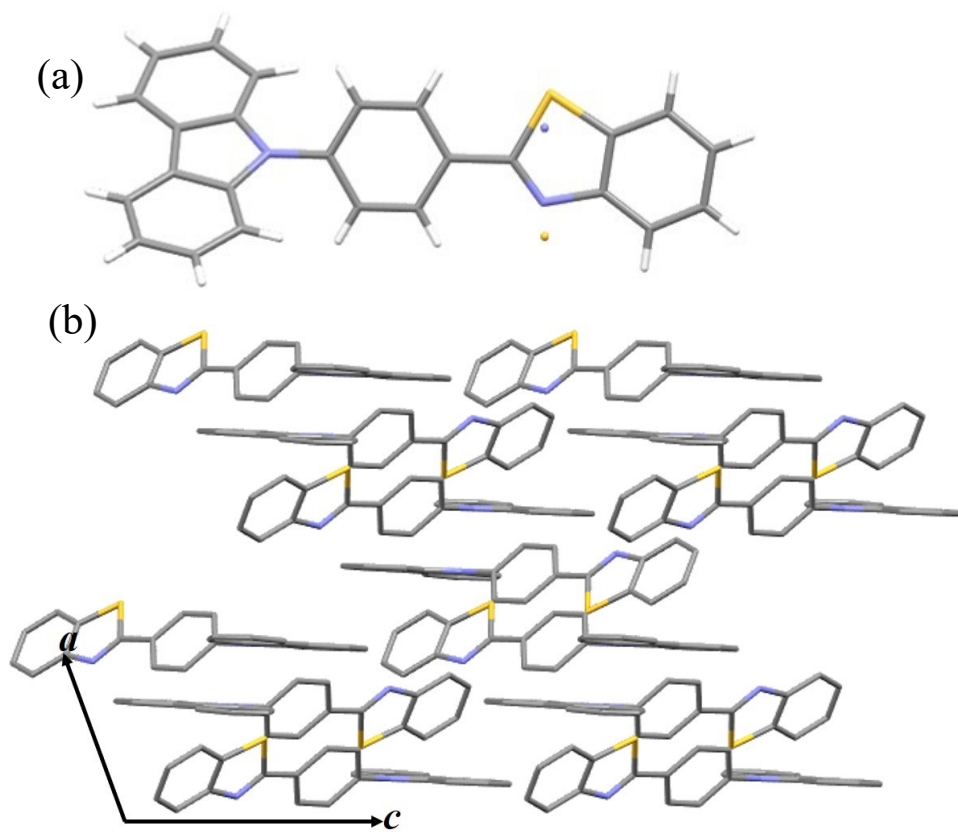

Figure S4. (a) Molecular structure and (b) packing of Cz-T in the crystal lattice.
